# Supplementary material for: Stagnant ice and age modelling in the Dome C region, Antarctica
Source: Copernicus journal article supplement (doi:10.5194/tc-17-3461-2023), 2023-08-24
Supplement: Supplementary file 1 [file tc-17-3461-2023-supplement.pdf]

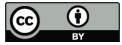

*Supplement of*

## **Stagnant ice and age modelling in the Dome C region, Antarctica**

**Ailsa Chung et al.**

*Correspondence to:* Ailsa Chung (ailsa.chung@univ-grenoble-alpes.fr) and Frédéric Parrenin (frederic.parrenin@univ-grenoble-alpes.fr)

The copyright of individual parts of the supplement might differ from the article licence.

## Supplementary material

### 1D numerical model details

We use a modified version of the 1D numerical model in Lilien et al. (2021). We integrate over  $\frac{1}{\tau}$  (Eq. 3) with linear interpolation between vertical nodes. The thinning function is fairly linear near the surface and changes more quickly with depth towards the bedrock, therefore we use a quadratic vertical grid. This means that the nodes are spaced further apart near the surface and are closer together near the bedrock. We use an average step size  $d\zeta = 0.001$  and a ratio of 0.1 meaning that the distance between the first node at the surface and the second below is  $1.9d\zeta$ . The distance between the penultimate node and the bedrock node is  $0.1d\zeta$ .

### MYIC age-depth profile

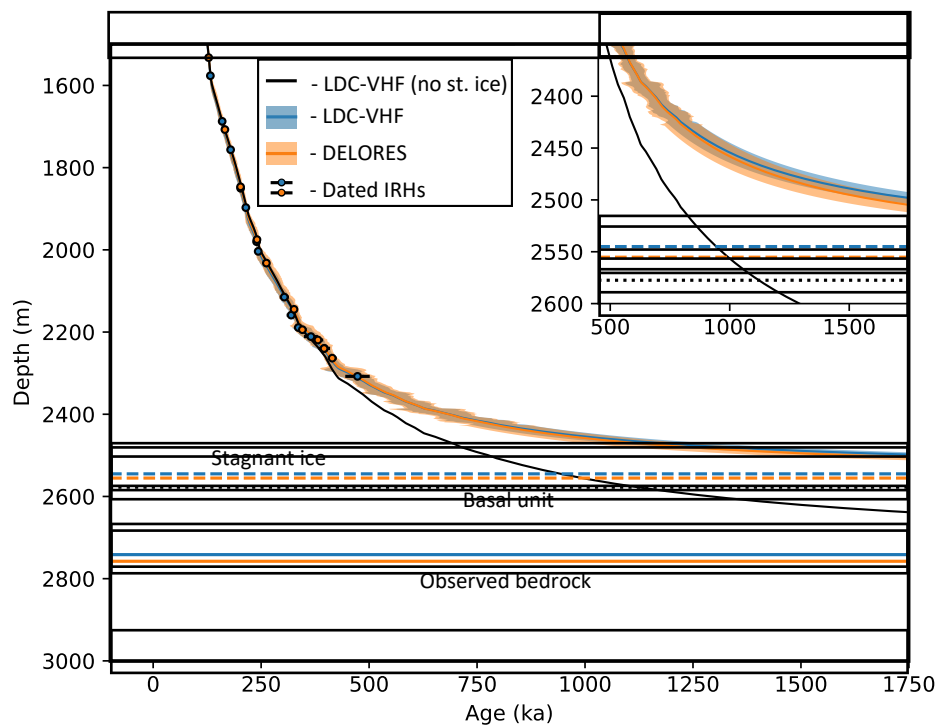

**Figure S1.** Modelled age depth profile at the BELDC drill site along with age uncertainty. Results for the DELORES dataset are in orange, results for the LDC-VHF dataset are in blue with the shaded areas showing  $1\sigma$  uncertainty. Black circles are the IRH ages with their age uncertainties shown as horizontal bars (Tables II and III respectively). The thick continuous lines show the radar observed bedrock depths  $H_{obs}$  (colours indicating the dataset origin), the dashed lines provide the top of the modelled stagnant ice layer  $H_m$  and the dotted black line shows the top of the basal unit identified in the LDC-VHF radar survey. The inset shows the deepest modelled section in more detail. The black line shows the modelled age-depth profile predicted by the model with no stagnant ice layer.
